# Supplementary material for: Urban invaders are not bold risk-takers: a study of 3 invasive lizards in Southern California
Source: Oxford University Press journal article supplement (doi:10.1093/cz/zoaa015), 2020-03-25
Supplement: zoaa015_supplementary_data.docx [file zoaa015_supplementary_data.docx]

**Electronic Supplementary Material**

Morphometric measurements

We measured the snout-vent-lengths (SVL in mm) of museum specimens of adult individuals collected from the five sites in Southern California. All specimens were collected relatively recently, with none collected more than four years prior to the FID trials. All species showed male-biased sexual size dimorphism (Table S1).

**Table S1.** Summary statistics of body sizes (snout-vent-length, mm) of four lizard species used in this study.

|  | Male | | Female | |
| --- | --- | --- | --- | --- |
| Species | Mean ± SD | *N* | Mean ± SD | *N* |
| Western fence lizard (*Sceloporus* *occidentalis*) | 66.3 ± 7.1 | 58 | 61.9 ± 7.8 | 23 |
| Brown anole (*Anolis sagrei*) | 56.0 ± 4.1 | 89 | 45.7 ± 3.2 | 40 |
| Green anole (*Anolis carolinensis*) | 62.8 ± 7.0 | 26 | 50.4 ± 4.9 | 19 |
| Italian wall lizard (*Podarcis siculus*) | 71.7 ± 7.1 | 87 | 66.8 ± 5.5 | 73 |

Supplemental Analyses and Results

Because two outlying data points had studentized residuals larger than 4 and were affecting the normality of the data in the model comparing refuge distance in brown anoles to western fence lizards, we ran two separate ANOVAs, one with the full dataset and one with the removal of the outlying points. Both observations were from fence lizards that were found several meters from refuge and the removal of these points did not change the overall results of the model. Each ANOVA was run with a heteroscedasticity-consistent coefficient covariance matrix, and had species, site, and their interaction as factors, and distance to closest refuge as the dependent variable (square-root transformed). Results of the two models are in Table S2. Results from the general linear models evaluating differences in FID between invasive and non-invasive populations are in Tables S3-S5.

**Table S2.** Results from two-way ANOVAs, one with the full dataset and another with two outliers removed, on distance to closest refuge for the comparison of nonnative brown anoles to native western fence lizards.

| Model | Factors | *F* | *P* |
| --- | --- | --- | --- |
| Full dataset (*N*=105) | Species | 35.82 | < 0.001 |
|  | Site | 6.25 | 0.014 |
|  | Species*Site | 0.91 | 0.340 |
| Reduced dataset (*N*=103) | Species | 41.93 | < 0.001 |
|  | Site | 5.82 | 0.018 |
|  | Species*Site | 1.36 | 0.247 |

**Table S3.** General linear model comparing the FIDs between brown anoles and western fence lizards at two sites (Orange and Santa Ana). Model: sqrt(FID) ~ Invasion Status + Site + Distance to Refuge + Starting Distance + Height + Invasion Status*Site + Invasion Status*Starting Distance. Significant outcomes are in bold.

| Factors | Estimate | Std. Error | t value | P |
| --- | --- | --- | --- | --- |
| (Intercept) | 12.209 | 1.642 | 7.436 | <0.001 |
| Invasion Status | -2.751 | 2.255 | -1.220 | 0.225 |
| Site | 1.091 | 1.211 | 0.901 | 0.370 |
| Distance to Refuge | -0.002 | 0.009 | -0.184 | 0.854 |
| Starting Distance | 0.002 | 0.002 | 0.948 | 0.346 |
| Height | -0.006 | 0.017 | -0.343 | 0.732 |
| **Invasion Status*Site** | **-4.214** | **1.725** | **-2.444** | **0.016** |
| **Invasion Status*Starting Distance** | **0.007** | **0.003** | **2.498** | **0.014** |

**Table S4.** General linear model comparing the FIDs between green anoles and western fence lizards at two sites (San Diego and Tustin). Model: sqrt(FID) ~ Invasion Status + Site + Distance to Refuge + Starting Distance + Height. Significant outcomes are in bold.

| Factors | Estimate | Std. Error | t value | P |
| --- | --- | --- | --- | --- |
| (Intercept) | 4.969 | 1.635 | 3.039 | 0.003 |
| Invasion Status | 2.269 | 1.949 | 1.164 | 0.247 |
| **Site** | **2.904** | **1.196** | **2.428** | **0.017** |
| Distance to Refuge | 0.013 | 0.010 | 1.337 | 0.184 |
| Starting Distance | 0.004 | 0.002 | 1.668 | 0.098 |
| Height | -0.017 | 0.013 | -1.297 | 0.198 |
| **Invasion Status* Height** | **-0.043** | **0.021** | **-2.076** | **0.040** |

**Table S5.** General linear model comparing the FIDs between Italian wall lizards and western fence lizards at one site (San Pedro). Model: sqrt(FID) ~ Invasion Status + Distance to Refuge + Starting Distance + Height. Significant outcomes are in bold.

| Factors | Estimate | Std. Error | t value | P |
| --- | --- | --- | --- | --- |
| (Intercept) | 9.342 | 1.335 | 6.998 | <0.001 |
| **Invasion Status** | **-2.383** | **0.990** | **-2.408** | **0.019** |
| Distance to Refuge | -0.013 | 0.015 | -0.910 | 0.366 |
| **Starting Distance** | **0.011** | **0.002** | **4.969** | **<0.001** |
| Height | -0.002 | 0.012 | -0.171 | 0.864 |

**
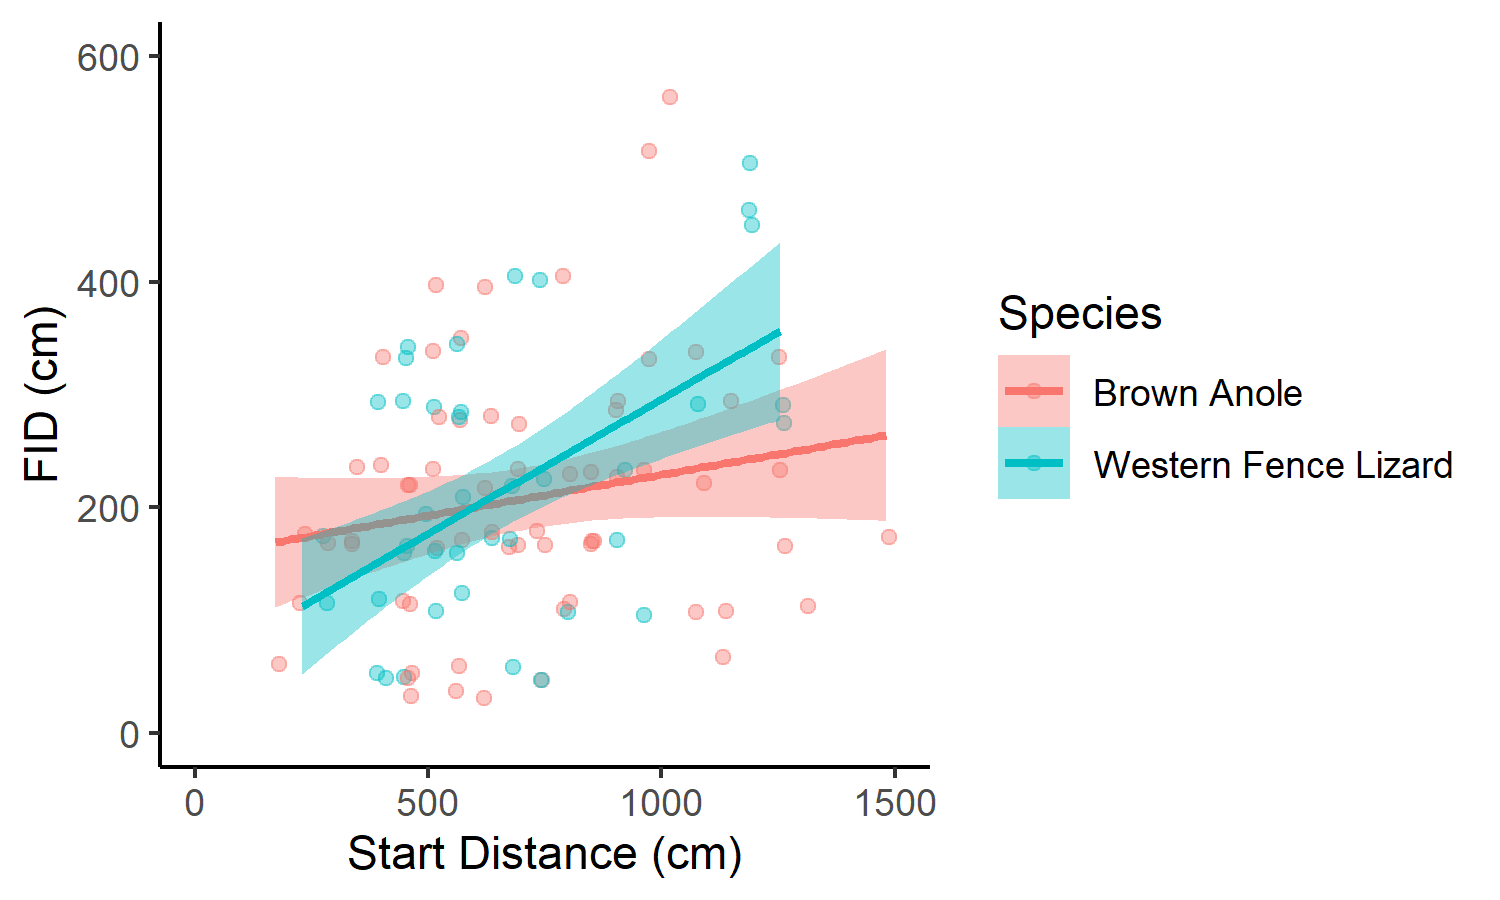
**

**Figure S1.** Relationship between starting distance and flight initiation distance in native western fence lizards and invasive brown anoles. Western fence lizards were more sensitive to starting distance than brown anoles (significant invasion status*starting distance interaction at P = 0.014, see Table S3). Points are slightly jittered to reduce overlap.


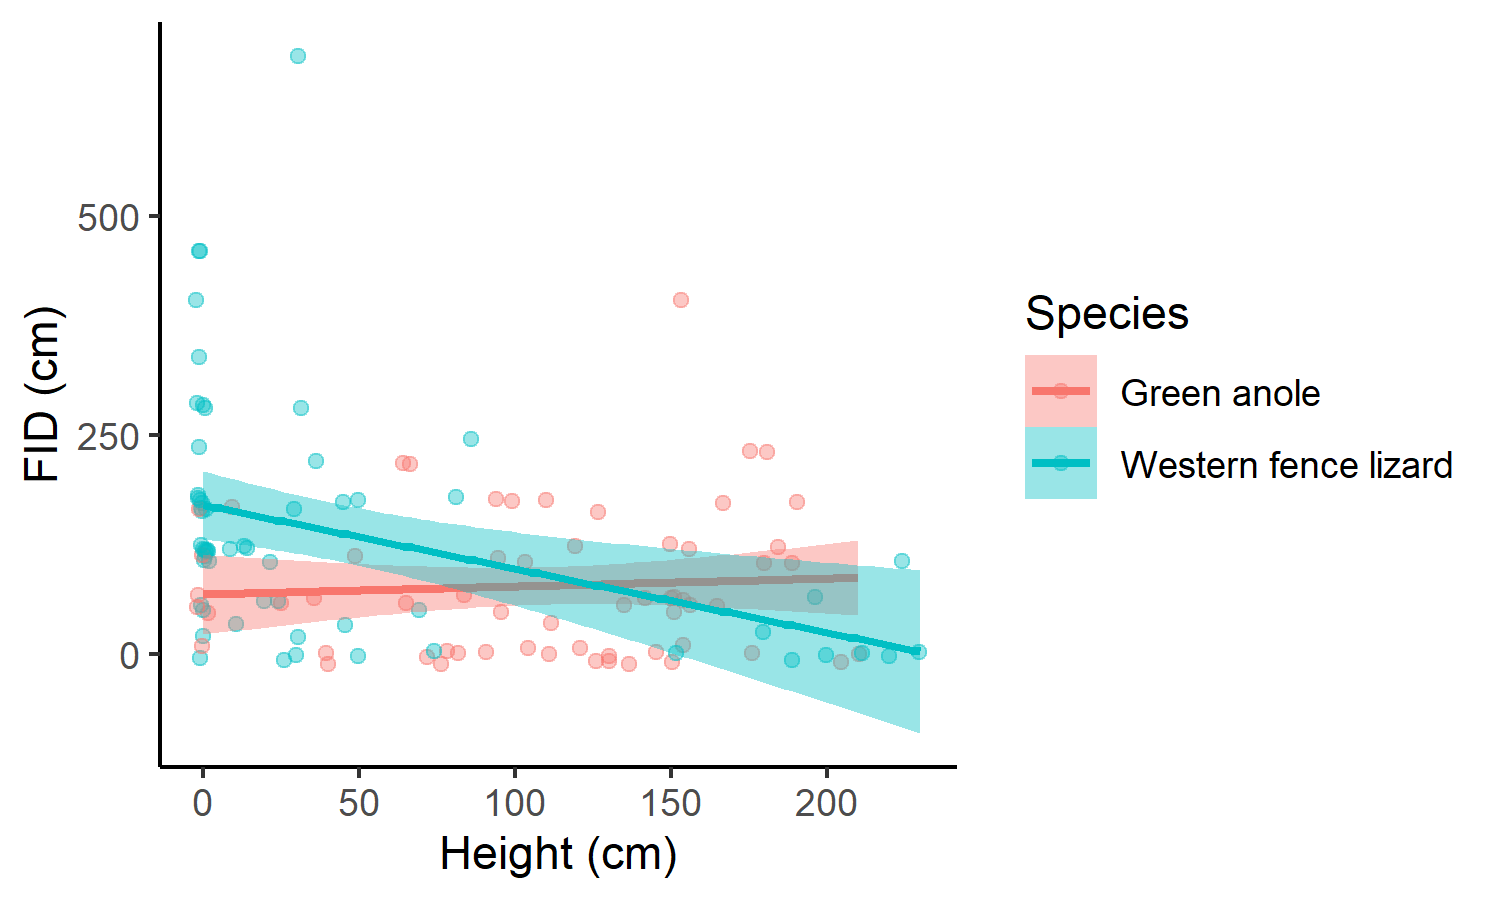


**Figure S2.** Relationship between height and flight initiation distance in native western fence lizards and invasive green anoles. Western fence lizards were more sensitive to height than green anoles (significant invasion status*height interaction at P = 0.04, see Table S4). Points are slightly jittered to reduce overlap.
